# Supplementary material for: BET1 variants establish impaired vesicular transport as a cause for muscular dystrophy with epilepsy
Source: PubMed Central journal article supplement (PMC8649873; doi:10.15252/emmm.202013787), 2021-11-15
Supplement: EMMM-13-e13787-s003.pdf [file EMMM-13-e13787-s003.pdf]

## Expanded View Figures

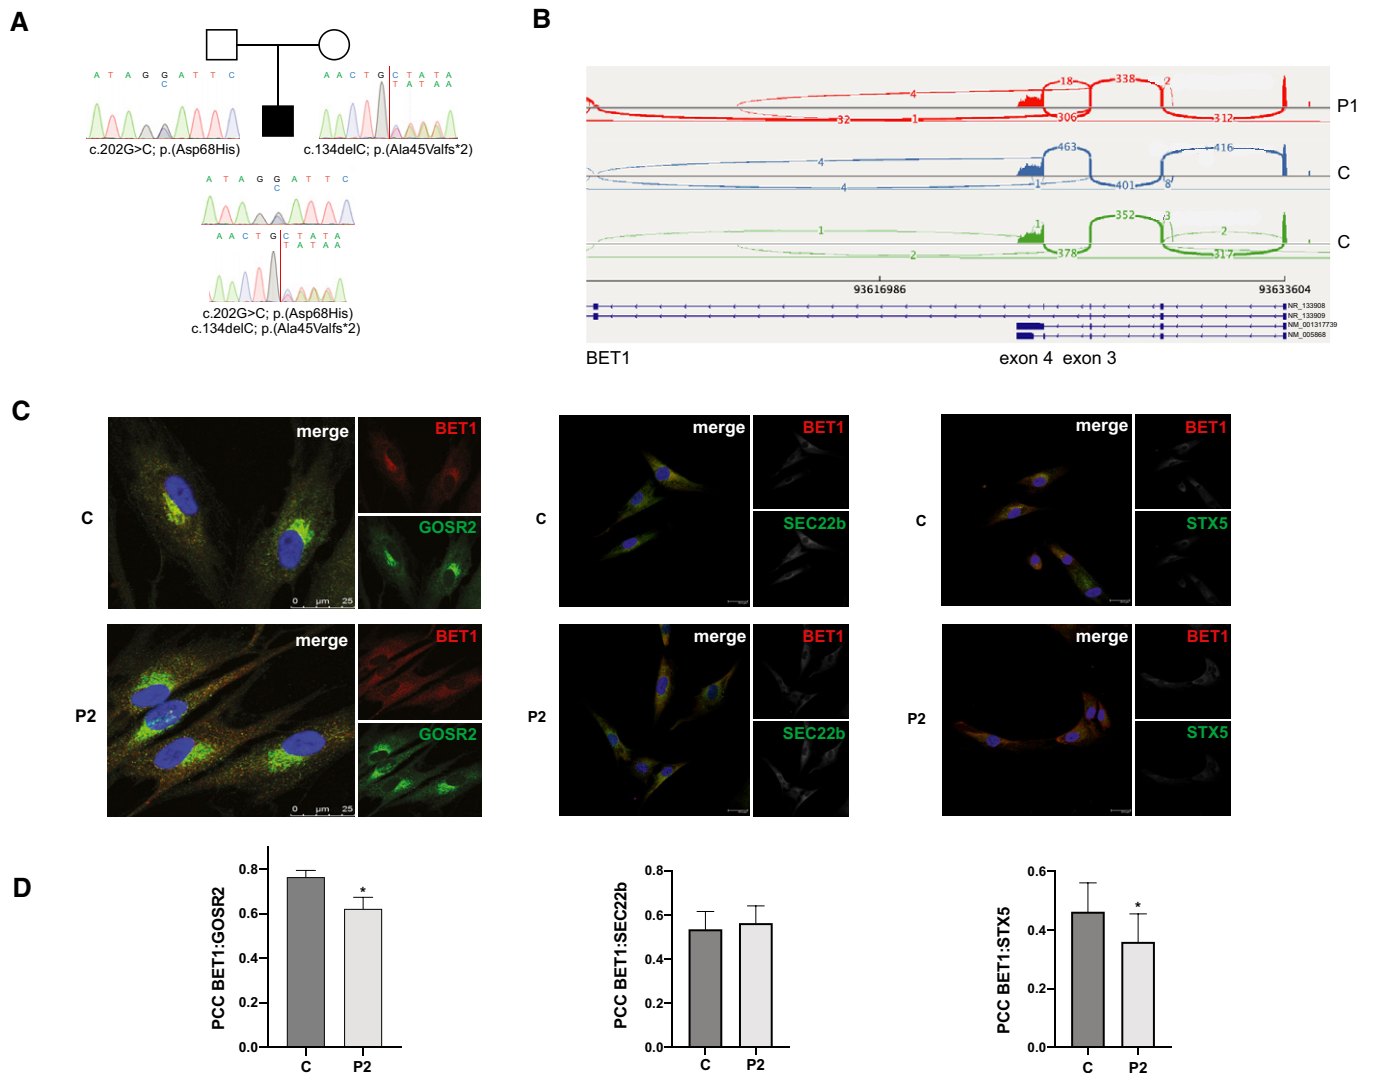**Figure EV1. Genetic studies in P1.**

- A Pedigree of P1 with corresponding *BET1* Sanger chromatogram depicting the paternally inherited c.202G>C; p.(Asp68His) missense variant and a maternally inherited c.134delC; p.(Ala45Valfs\*2) frameshift variant (NM\_005868), consistent with recessive inheritance.
- B Sashimi plots comparing fibroblast RNA sequencing reads in P1 (red) and two control muscle samples (blue and green) at the exons 3–5 of *BET1*.
- C Immunofluorescence images of *BET1* (red) and *GOSR2* (green) in fibroblasts from P1, P2, and control. In P1, *BET1* immunoreactivity is reduced. Scale bar: 25  $\mu$ m.
- D In the overlay, *BET1* colocalization with *GOSR2* and *Syntaxin-5* is reduced in P2 compared to controls while *BET1* colocalization with *SEC22b* is unchanged. *BET1* colocalization was determined using Pearson's correlation coefficient (PCC) on regions of interest (ROIs) drawn around cells (*GOSR2* P2:  $n = 56$ ; C:  $n = 86$ ,  $P = 0.0025$ ) (*Syntaxin-5* P2:  $n = 27$ ; C:  $n = 32$   $P = 0.0006$ ) (*SEC22b* P2:  $n = 27$ ; C:  $n = 30$ ,  $P = 0.2093$ ). (\* $P \leq 0.05$  Mann–Whitney  $U$ -test). Data represented are mean  $\pm$  SEM.

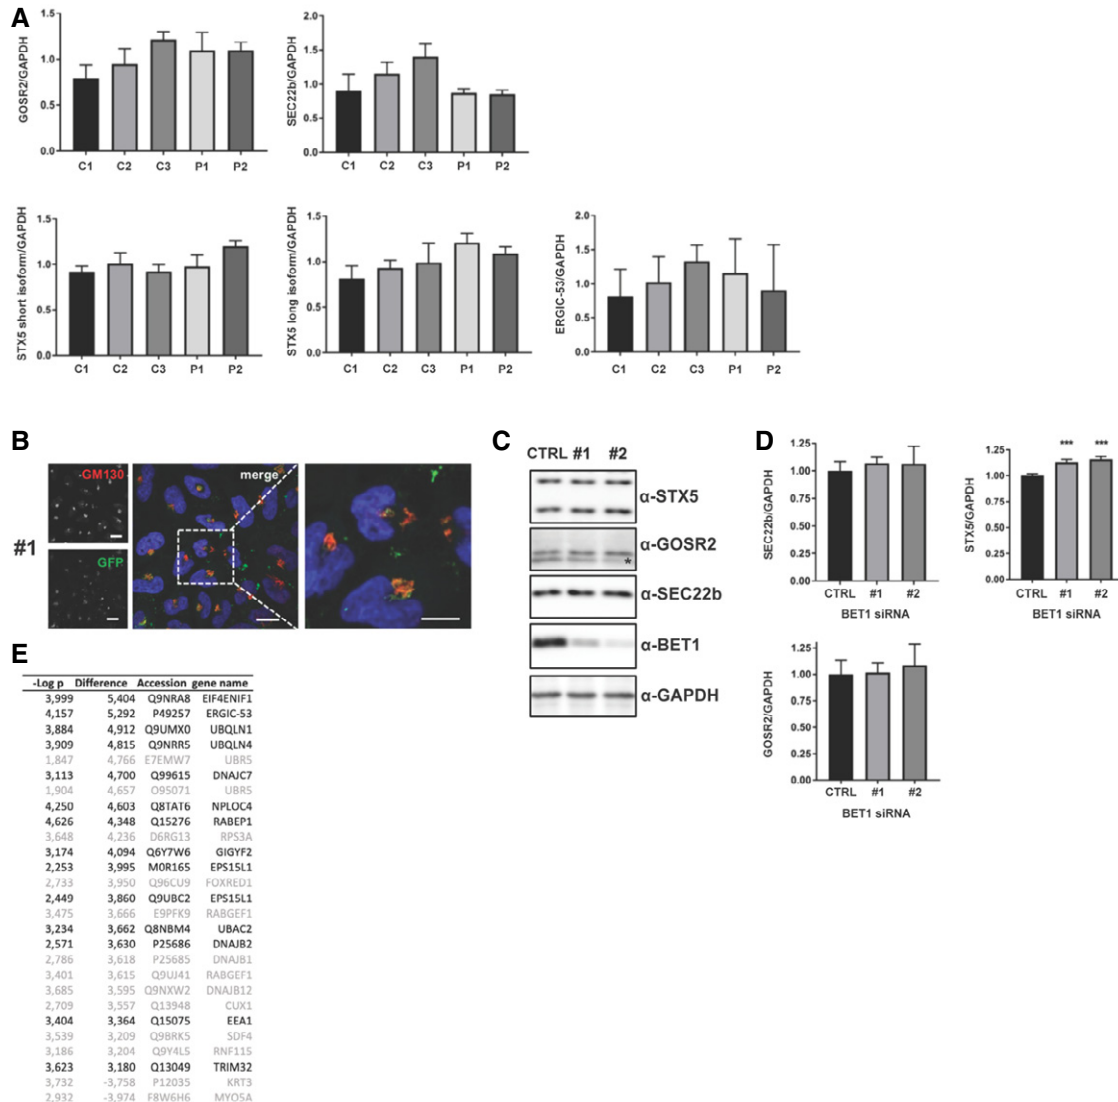

**Figure EV2. Normal SNARE complex partners in BET1 fibroblasts with reduced colocalization at the cis-Golgi in transfected cells.**

- A Quantification of protein levels of BET1 SNARE complex partners and the novel interaction partner ERGIC-53 in fibroblasts. Values are normalized to GAPDH. No significant differences between the control and patient fibroblasts were detected. Data represented are mean  $\pm$  SD of four biological replicates. Significant differences were analyzed by one-way ANOVA followed by Tukey's *post hoc* test.
- B Immunofluorescence images of *BET1* knockdown HeLa pC4 cells transfected with *BET1* siRNA #1 10 min after induction of ER-to-Golgi transport with solubilizer. Scale bar: 20  $\mu$ m.
- C HeLa pC4 cells were transfected with control siRNA (ctrl) or siRNA against *BET1* (#1 and #2) and protein levels of *BET1* and ER-to-Golgi complex SNAREs SEC22b, Syntaxin-5, and GOSR2 were analyzed by immunoblot. \*residual SEC22b signal after immunoblot stripping.
- D Quantification of EV2C. Data represented are mean  $\pm$  SD of three biological replicates. Significant differences to ctrl cells were analyzed by one-way ANOVA followed by Dunnett's *post hoc* test. \*\*\* $P < 0.001$ .
- E Table showing a spectral count-based summary of three independent AP-MS experiments with significant hits shown in Fig 5A. Hits are sorted by the difference of *BET1*-WT and *BET1*-Ile51Ser. Hits which do not fulfill the criteria to have a mock-transfected spectral count of two or less are colored in grey.

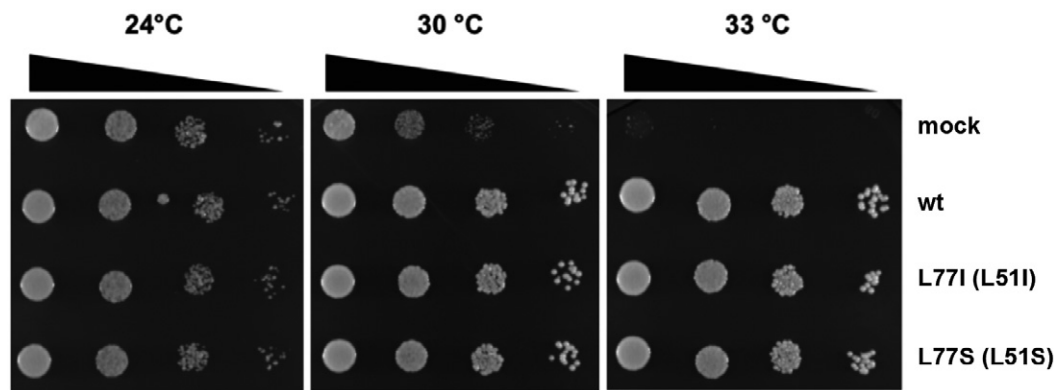

**Figure EV3. The effect of BET1 variants on yeast growth.**

BET1 Leu77Ile (Leu51Ile) and Leu77Ser (Leu51Ser) show similar growths compared to BET1 wild type. Temperature-sensitive strain of *S. cerevisiae* was transformed with wild-type BET1, the two different variants, and a mock plasmid. At 24°C, growth was detected for all variants and wild type, including the negative control. Only the negative control showed an impairment of growth at restrictive temperatures (30°C and 33°C).
